# Supplementary material for: Accurate 3D radiative transfer simulation of spectral solar irradiance during the total solar eclipse of August 21, 2017
Source: Copernicus journal article supplement (doi:10.5194/acp-2019-609), 2019-08-27
Supplement: Supplementary file [file acp-2019-609-AC1-supplement.pdf]

# Answers to Referee 1

September 17, 2019

## Influence of clouds

### Comment by Referee

My main concern is that the simulations are under clear atmospheric conditions without discussion about possible cloud effects. Bernhard and Petkov(2019) mentioned that "The sky was free of clouds in the direction of the Sun, with small clouds lingering only near the horizon." This is consistent with GOES-16 images (see <http://www2.mmm.ucar.edu> [...]) Even though thin cirrus clouds were not in the direction of the observer and the Sun, they could be potentially important generating significant amount of diffuse radiation reaching the surface near and in the totality region. Could the presence of thin cirrus clouds explain the larger observed spectral irradiance compared to the model simulations? Maybe, a simple simulation for a fraction of thin cirrus cloud not shading the Sun could help to answer this question. The results could be included in discussion section.

### Authors' Response

The amount of clouds were really negligible. The sentence mentioned in Bernhard and Petkov (2019) refers to the clouds visible in Figure 1. Besides these, the only other feature visible on the clear sky is a thin layer close to the horizon in the gap between the mountains in the far right in Figure 2. It is not clear, whether they are attributable to clouds or aerosols. Looking at satellite pictures, the larger area around the observation spot was mostly free of clouds as well (Compare to Figure 3 and Figure 4). Concerning these circumstances, clear atmospheric conditions seemed the most reasonable assumption for our setup.

## 1 Comment

### 1.1 Comment by Referee

Spell out MYSTIC in line 7 in abstract and line 54 in introduction section.

## **1.2 Authors' Response**

Changed accordingly.

## **1.3 Changes to manuscript**

...the radiative transfer model MYSTIC (Monte Carlo code for the phYSically correct Tracing of photons In Cloudy atmospheres;Mayer (2009); ...

## **2 Comment**

### **2.1 Comment by Referee**

"contribution function" is introduced in line 70 of section 2. This is an important concept in this paper. However it is not very clear to me. A better explanation will be helpful.

### **2.2 Authors' Response**

We tried to make the concept more clear in section 2.2., especially by adding the following explanation.

### **2.3 Changes to manuscript**

If a photon leaves at the TOA into the direction of the sun, it is traced further to the Sampling Plane (compare Figure 1), where it is counted at the incident position. Averaging over many photons, this creates a map of contributions, i.e. how much every point in the sampling plane contributes to the irradiance at the observer position. We call this map the contribution function  $C(\vec{d}, \lambda, t)$ .

## **3 Comment**

### **3.1 Comment by Referee**

Remove Mayer (2009); Emde and Mayer (2007) in line 50 in section 2.2 since they were already referenced before.

### **3.2 Authors' Response**

Changed accordingly

## 4 Comment

### 4.1 Comment by Referee

Is  $w(d_0, \lambda, t)$   $e$ -tau in line 16 of section 2.3 the direct component for partial eclipse conditions? If so, make it clear

### 4.2 Authors' Response

Yes, it is the direct component under partial conditions, if evaluated at the corresponding times.  $w$  describes the intensity of solar irradiance at every position and time in the sampling plane, including the moon's shadow. Evaluating it at the described position  $d_0$  and multiplying by the atmospheric transmittance, we get direct radiation under non-, partial or total eclipse conditions (=0 in the latter case).

### 4.3 Changes to manuscript

Because for partial eclipse conditions, the light of the sun reaching the sensor directly...

## 5 Comment

### 5.1 Comment by Referee

"Because its time dependence is in the order of weeks, it is kept constant during the eclipse." in line 25 of section 2.3. Consider to remove this sentence since it was referenced.

### 5.2 Authors' Response

Sentence was removed and replaced by: The factor  $\kappa(t)$  corrects the ETS for variations in the earth-sun distance by use of the formula from Iqbal1983, evaluated for August 21.

## 6 Comment

### 6.1 Comment by Referee

"The spectral irradiance of the 315 nm wavelength is remarkably lower than the visible irradiances, which is mainly due to ozone absorption." Is that really true? Perhaps one needs to compare irradiance during the totality with that in partial eclipse. If we look at 17:15:00, the relative difference between irradiance at 315 nm and 555 nm is about that same. I understand that ozone absorption reduces the irradiance at 315 nm reaching the troposphere, where most of the scattering takes place. Of course, the Rayleigh scattering is strongest among all

wavelength considered. A better discussion will help readers to understand this point.

## 6.2 Authors' Response

We changed the sentence in the following way:

## 6.3 Changes to manuscript

The spectral irradiance of the 315 nm wavelength is remarkably lower than the visible irradiances, which is mainly due to the naturally lower irradiance values under non-eclipse condition.

# 7 Comment

## 7.1 Comment by Referee

Figure 7 is very confusing. "Most of the diffuse photons originate from the vicinity of a line (black in Figure 7) at TOA between the point directly above the observer (black dot in Figure 7) and the intersection point of the observer-sun line with the TOA (yellow dot)." in line 65 of section 3.1. Not sure about a line at TOA because the scattering occurs in the atmosphere. "Black dot" should be green dot? "the vicinity of a line" is confusing. It seems that most of the diffuse photons originate from an area about 20 km in radius around the yellow dot. Is figure 7 (upper panel) for the partial eclipse at the observer's site since it says for 17:20 and the observer is out of the ellipse? If possible, it would be nice to have the artifact white circle removed.

## 7.2 Authors' Response

Indeed, this figure might be difficult to understand at the moment. The key point is, that the contribution function in the sampling plane is shown, located 120km above the observer. To enhance understanding, we propose to change Figure 1 in the manuscript according to Figure 5, which should explain the whole setup better. In Figure 5, we introduced the location of the green and yellow points as defined in Figure 7 of the manuscript. Basically, Figure 5 provides a side view of the setup, while Figure 7 in the manuscript can be interpreted as a view from above.

The "black dot" in the manuscript should of course be "green dot".

Concerning the white circles: In our setup, they are difficult to remove technically. Because they are present in the contribution function in the model, we decided to show them in Figure 7 in the manuscript as well.

### **7.3 Changes to manuscript**

Caption of Figure 7 in manuscript: "The upper image illustrates the relative contribution from each point in the sampling plane to the diffuse irradiance. Shown is a 150 km x 300 km cutout of the contribution function at 17:20 and 490 nm wavelength. The green dot is located directly above the observer, the yellow dot marks the origin of the direct solar radiation (compare to Figure 1). Small black circles indicate the center of the lunar shadow on its way from west to east in 5 s steps with times annotated every minute. The dashed ellipse represents the shape of the umbral shadow at 17:20. The lower histogram shows the contribution function along the black line, integrated within the area bounded by the two grey lines. The white circles visible in the upper image are an artifact from the projection of the spherical grid of the simulation to the flat sampling plane."

## **8 Comment**

### **8.1 Comment by Referee**

In Figure 9 caption, suggest to indicate 17:20 (totality) and 17:12 (partial eclipse).

### **8.2 Authors' Response**

Changed accordingly.

## **9 Comment**

### **9.1 Comment by Referee**

A discussion of the physical mechanism of different surface albedo on surface irradiance for partial and total eclipse will be useful (first paragraph on pager 6)

### **9.2 Authors' Response**

Please specify, which features should be explained in more detail, because some of them are already discussed in the paragraph. We added the following sentence:

### **9.3 Changes to manuscript**

[...which decreases relatively smoothly towards the near infrared.] This is due to the smaller contribution of diffuse irradiance, which is the only part affected by changes in the albedo, in the near infrared under partial eclipse conditions. [If however...]

## **10 Comment**

### **10.1 Comment by Referee**

Figure 10 is hard to understand. Why "From this, it can be seen that areas in a distance between 20 km and 400 km are the reason for most of the observed changes." (line 43 on page 6)? The purpose of this is to assess the validity of assumption of spatially uniform albedo, which may not valid for the Pacific Ocean. Perhaps ignore this figure and just make a statement to about the result: surface albedo is not important beyond 400 km, and the results of simulations will not change even if the albedo is different from the ocean albedo for the Pacific.

### **10.2 Authors' Response**

So far, we have changed the surface albedo globally, without discussing the importance of different areas. With Figure 10, we wanted to make a quantitative statement about the importance of surface areas within a certain distance. "20km-400km" comes from the fact, that the jump from 0 to 1 of the blue curve occurs almost completely between 20km and 400km (90%). Should a future study decide to implement a detailed map of the surface, we hope to provide some advice on the necessary coverage and resolution with these results.

## **11 Comment**

### **11.1 Comment by Referee**

11. line 80 on page 6, "+-20% at 304 nm". 20% is out of scale in Figure 11. At least mention it in the figure caption.

### **11.2 Authors' Response**

Changed accordingly.

## **12 Comment**

### **12.1 Comment by Referee**

Paragraph line 81 on page 6, "Here the contribution of the direct irradiance is larger than in the ultraviolet, and direct radiation is not affected by the vertical distribution of the absorber but only by the column." Perhaps mention ozone absorption optical depth at the peak of the Chappuis bands is about 0.04 compared to the absorption optical depth of 1.8 at 304 nm, or a sentence about ozone absorption cross section in Fig. 11 since it is already there.

## **12.2 Authors' Response**

Changed accordingly.

## **12.3 Changes to manuscript**

[...changes in irradiance of  $\pm 20\%$  at 304 nm and  $\pm 0.5\%$  around 600 nm] (At 304 nm, the optical depth due to ozone is around 2.1, in the Chappuis bands between 400 nm and 650 nm, it peaks at 0.05).

## **13 Comment**

### **13.1 Comment by Referee**

Would be nice to have the same legends for both upper and lower panels in Figure 11.

### **13.2 Authors' Response**

We changed the Figure according to Figure 6.

## **14 Comment**

### **14.1 Comment by Referee**

line 4 on page 7, "+30% at 304 nm". But 30% is out of scale in Figure 11.

### **14.2 Authors' Response**

See section 11

## **15 Comment**

### **15.1 Comment by Referee**

line 3 on page 8, "The last series will be denoted as P2017. The overall effect shares many characteristics with the curves in Figure 9, where the surface albedo was changed. Eight minutes before the totality, changes of up to 2% can be observed for the shorter wavelengths. The increase in direct irradiance is the reason for the vanishing differences at longer wavelengths. Observations during totality show reductions in irradiance of up to 60%. This shows that a disproportionately high amount of radiation is coming from the horizon (For isotropically incoming radiance, we would expect only 3% reduction in irradiance.). . ." I don't get it. Figure 9 shows the theoretical calculations. I don't see why changes of irradiance (relative to what?) can be observed.

## **15.2 Authors' Response**

There was definitely a reference missing in the manuscript. The paragraph refers primarily to Figure 12.

## **15.3 Changes to manuscript**

The last series will be denoted as *P2017*. The results can be seen in Figure 12.

## **16 Comment**

### **16.1 Comment by Referee**

Description of Figure 12 should be included in the text. Maybe in the last paragraph of section 4.2.

### **16.2 Authors' Response**

See section 15

## **17 Comment**

### **17.1 Comment by Referee**

Line 45 on page 10, "To correct the simulation for these errors, which have nothing to do with the eclipse, the simulation values were multiplied by the average deviation between 19:00 and 20:00 for each wavelength." Do not understand this? Also, do you assume that the atmospheric state didn't change?

### **17.2 Authors' Response**

Yes, our model does not include any changes in the atmosphere, especially none that might be caused by the eclipse itself (like for example an eclipse feedback on the amount of ozone, see e.g. Zerefos et. al. 2000). All of our parameterization are either general standard values (the midlatitude summer profile), or derived from irradiance measurements after the eclipse at 19.00 UTC like water vapor concentration or the aerosol optical depth. With these values, we can model non-eclipse irradiances with less than 5% deviation to the measurements around 19.00. To correct for these non eclipse-related deviations, all simulated channels were multiplied by a correction factor to fit the time from 19.00 to 20.00 (the procedure is similar to Bernhard & Petkov 2019, section 7.1).



## **18 Comment**

### **18.1 Comment by Referee**

Suggest to combine figures 15, 16, 17 to Figure 15a, 15b, 15c to reduce the number of figures. Suggest to remove "ratio" since the "ratio" is already in the title of Y-axis

### **18.2 Authors' Response**

Changed accordingly.

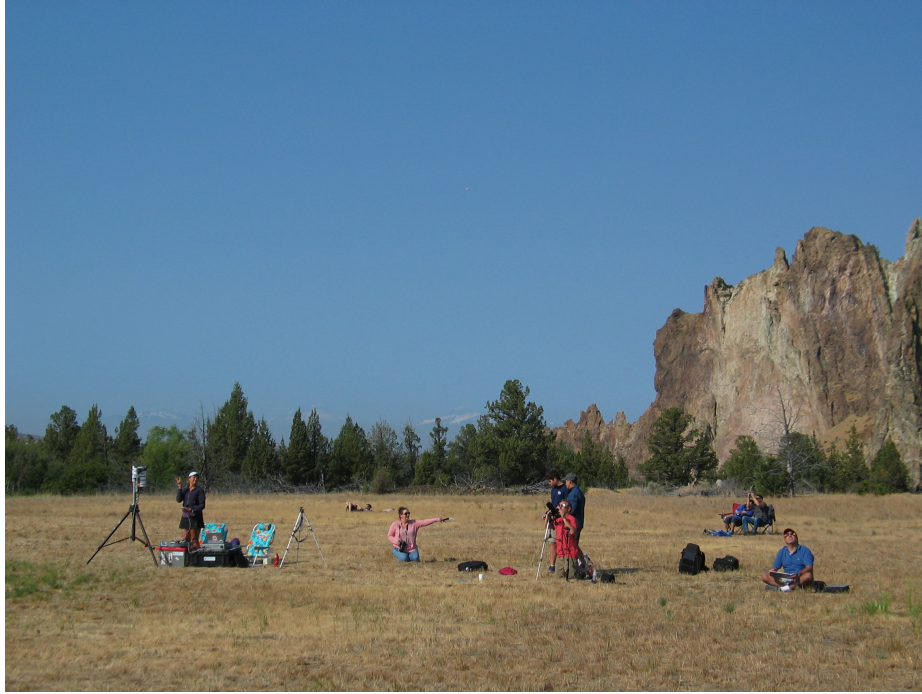

Figure 1: Picture taken at 9:57 local time (partial eclipse already started at 9.06), about 23 minutes before the start of totality.

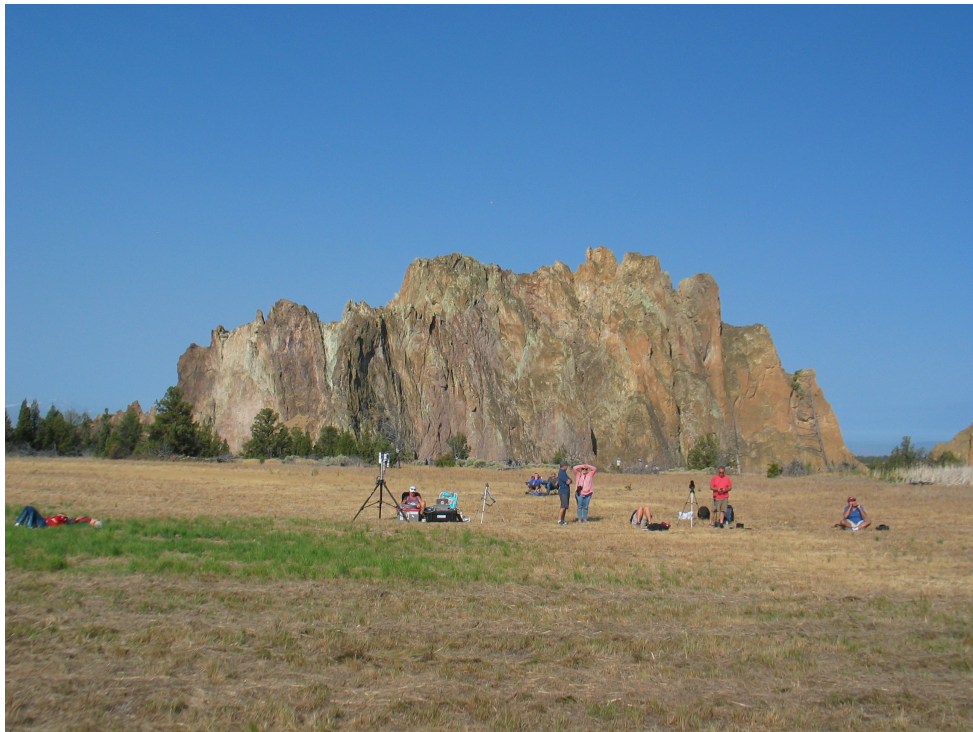

Figure 2: Picture taken at 9:25 local time.

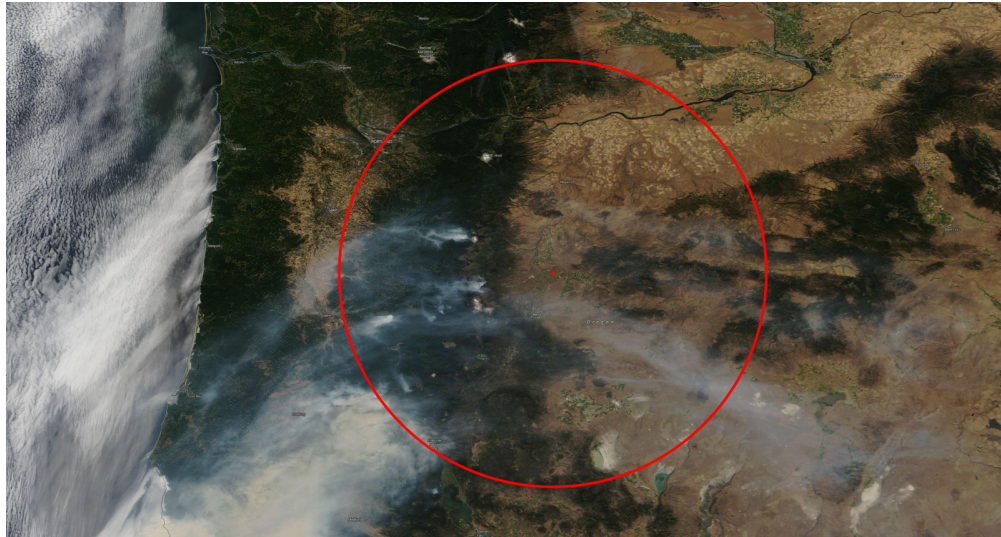

Figure 3: The large scale situation around the measurement site (red dot) at August 21, 2017. The red circle shows a 175 km radius. The white plumes visible in this area are from wildfires. Corrected Reflectance MODIS Image from Terra satellite, accessible via NasaWorldView: [https://worldview.earthdata.nasa.gov/?v=-125.74822628736678,42.11048430043591,-117.31072628736678,46.68958586293591&t=2017-08-21-T06%3A00%3A00Z&l=Reference\\_Labels,Reference\\_Features\(hidden\),Coastlines,VIIRS\\_SNPP\\_CorrectedReflectance\\_TrueColor\(hidden\),MODIS\\_Aqua\\_CorrectedReflectance\\_TrueColor\(hidden\),MODIS\\_Terra\\_CorrectedReflectance\\_TrueColor](https://worldview.earthdata.nasa.gov/?v=-125.74822628736678,42.11048430043591,-117.31072628736678,46.68958586293591&t=2017-08-21-T06%3A00%3A00Z&l=Reference_Labels,Reference_Features(hidden),Coastlines,VIIRS_SNPP_CorrectedReflectance_TrueColor(hidden),MODIS_Aqua_CorrectedReflectance_TrueColor(hidden),MODIS_Terra_CorrectedReflectance_TrueColor)



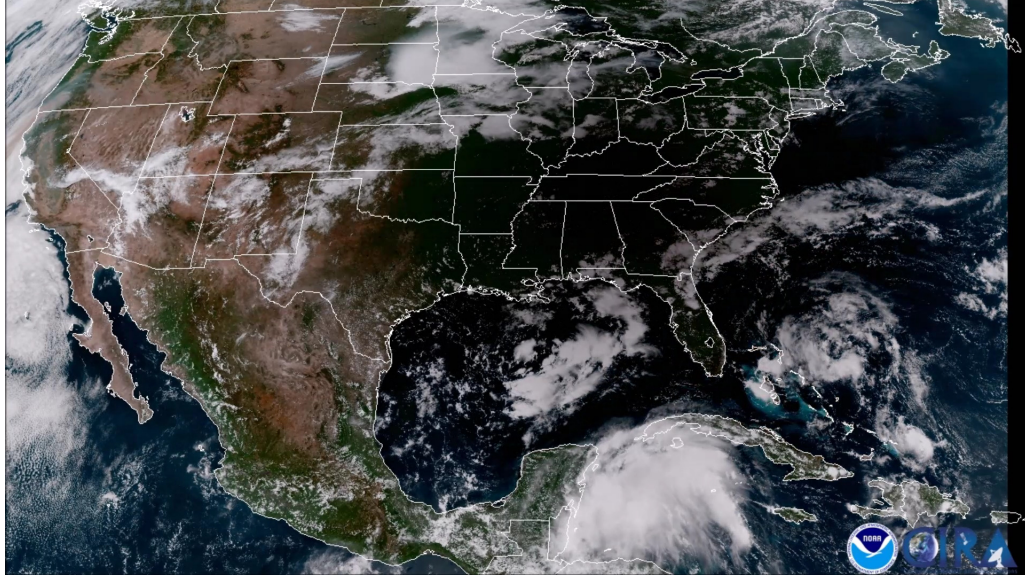

Figure 4: Picture taken by Goes 16 imager. The shadow of the moon is visible in the eastern part of the US. Snapshot from video available via [https://www.goes-r.gov/multimedia/originalVideoCopies/dataAndImagery/GOES16/conus\\_leaving\\_east\\_coast.mp4](https://www.goes-r.gov/multimedia/originalVideoCopies/dataAndImagery/GOES16/conus_leaving_east_coast.mp4)

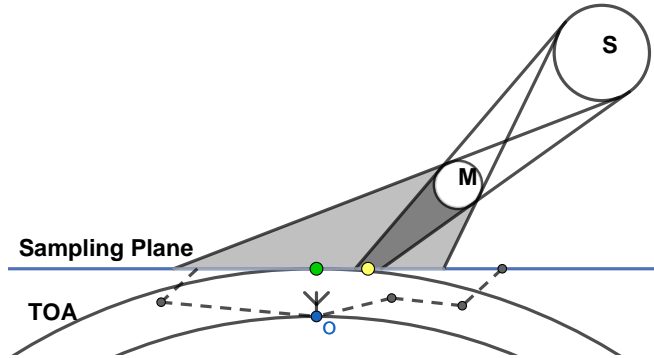

Figure 5: Schematic illustration of a solar eclipse, including umbral (dark gray) and penumbral (light gray) shadow and the definition of sampling plane and TOA (Top Of Atmosphere). S denotes the sun, M the moon and O the observer. The green dot is located vertically above the observer. The yellow dot represents the intersection of the observer-sun line with the sampling plane. The dashed lines show exemplary photon paths. In the atmospheric part, the solar angle is assumed to be constant, atmospheric refraction is neglected.

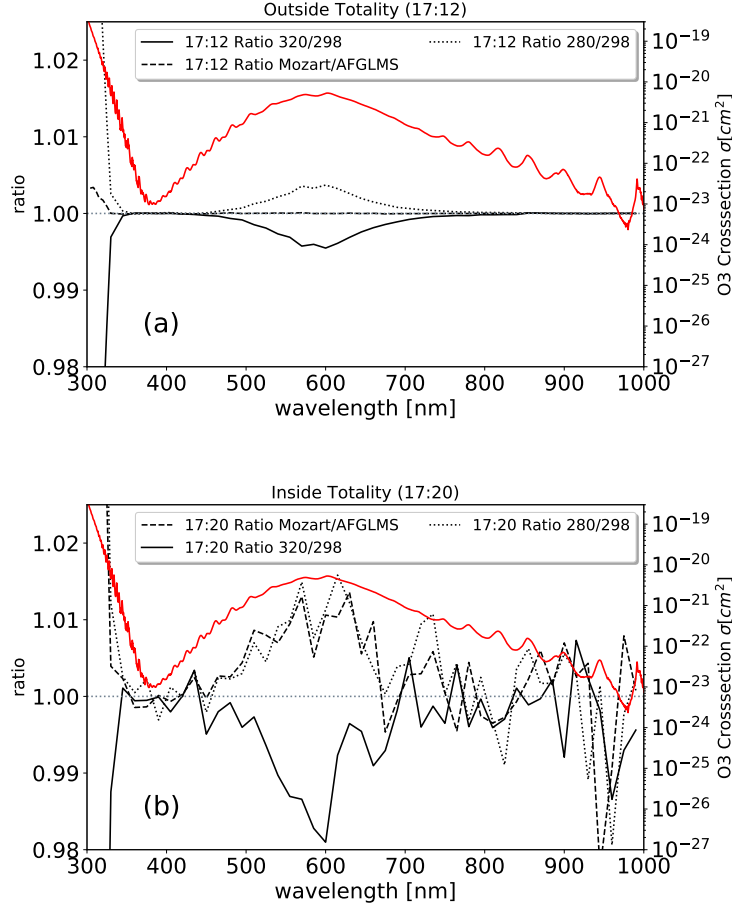

Figure 6: Simulated irradiance for a partial eclipse (panel (a)) and totality (panel (b)) for different wavelengths, normalized to the irradiance at the corresponding wavelength with the midlatitude summer profile scaled to 298 DU TOC. The solid line corresponds to an increase to 320 DU TOC, the dotted line to a decrease to 280 DU TOC. For the dashed line, the TOC was kept constant to 298 DU TOC, but the midlatitude summer profile was replaced with the one from MOZART. The position of 1.0 is indicated by a coordinate line for better readability. The red curve shows the total ozone absorption cross section, referenced to the right axis. For 304nm, changes are  $\pm 20\%$  outside totality and  $\pm 30\%$  inside (not shown).
